# Supplementary material for: Promiscuous signaling by a regulatory system unique to the pandemic PMEN1 pneumococcal lineage
Source: PubMed Central journal article supplement (PMC5436883; doi:10.1371/journal.ppat.1006339), 2017-05-18
Supplement: ppat.1006339.s004.pdf [file ppat.1006339.s004.pdf]

| S1 Table. <i>S. pneumoniae</i> strains utilized for pangenome analysis. Bold: PMEN1 strains. |                                 |                       |                                              |                               |
|----------------------------------------------------------------------------------------------|---------------------------------|-----------------------|----------------------------------------------|-------------------------------|
| Strain ID                                                                                    | Species                         | GenBank Accession No. | Analyses performed                           |                               |
| SK1076                                                                                       | <i>Streptococcus infantis</i>   | AFNN00000000          | Distribution within <i>Streptococcus</i> sp. |                               |
| SK970                                                                                        | <i>Streptococcus infantis</i>   | AFUT00000000          | Distribution within <i>Streptococcus</i> sp. |                               |
| ATCC 6249                                                                                    | <i>Streptococcus mitis</i>      | AEEN00000000          | Distribution within <i>Streptococcus</i> sp. |                               |
| B6                                                                                           | <i>Streptococcus mitis</i>      | FN568063              | Distribution within <i>Streptococcus</i> sp. |                               |
| bv. 2 str. F0392                                                                             | <i>Streptococcus mitis</i>      | AFUO00000000          | Distribution within <i>Streptococcus</i> sp. |                               |
| bv. 2 str. SK95                                                                              | <i>Streptococcus mitis</i>      | AFUB00000000          | Distribution within <i>Streptococcus</i> sp. |                               |
| NCTC 12261                                                                                   | <i>Streptococcus mitis</i>      | AEDX00000000          | Distribution within <i>Streptococcus</i> sp. |                               |
| SK1073                                                                                       | <i>Streptococcus mitis</i>      | AFQT00000000          | Distribution within <i>Streptococcus</i> sp. |                               |
| SK1080                                                                                       | <i>Streptococcus mitis</i>      | AFQV00000000          | Distribution within <i>Streptococcus</i> sp. |                               |
| SK321                                                                                        | <i>Streptococcus mitis</i>      | AEDT00000000          | Distribution within <i>Streptococcus</i> sp. |                               |
| SK564                                                                                        | <i>Streptococcus mitis</i>      | AEDU00000000          | Distribution within <i>Streptococcus</i> sp. |                               |
| SK569                                                                                        | <i>Streptococcus mitis</i>      | AFUF00000000          | Distribution within <i>Streptococcus</i> sp. |                               |
| SK575                                                                                        | <i>Streptococcus mitis</i>      | AICU01000001          | Distribution within <i>Streptococcus</i> sp. |                               |
| SK597                                                                                        | <i>Streptococcus mitis</i>      | AEDV00000000          | Distribution within <i>Streptococcus</i> sp. |                               |
| Uo5                                                                                          | <i>Streptococcus oralis</i>     | FR720602              | Distribution within <i>Streptococcus</i> sp. |                               |
| <b>PN4595-T23</b>                                                                            | <i>Streptococcus pneumoniae</i> | ABXO00000000          | Distribution within <i>Streptococcus</i> sp. | To establish PMEN1 enrichment |
| 70585                                                                                        | <i>Streptococcus pneumoniae</i> | CP000918              | Distribution within <i>Streptococcus</i> sp. | To establish PMEN1 enrichment |
| <b>ATCC 700669</b>                                                                           | <i>Streptococcus pneumoniae</i> | FM211187              | Distribution within <i>Streptococcus</i> sp. | To establish PMEN1 enrichment |
| CDC0288_04                                                                                   | <i>Streptococcus pneumoniae</i> | ABGF00000000          | Distribution within <i>Streptococcus</i> sp. | To establish PMEN1 enrichment |
| CDC1087-00                                                                                   | <i>Streptococcus pneumoniae</i> | ABFT00000000          | Distribution within <i>Streptococcus</i> sp. | To establish PMEN1 enrichment |
| CDC1873-00                                                                                   | <i>Streptococcus pneumoniae</i> | ABFS00000000          | Distribution within <i>Streptococcus</i> sp. | To establish PMEN1 enrichment |
| CDC3059-06                                                                                   | <i>Streptococcus pneumoniae</i> | ABGG00000000          | Distribution within <i>Streptococcus</i> sp. | To establish PMEN1 enrichment |
| CGSP14                                                                                       | <i>Streptococcus pneumoniae</i> | CP001033              | Distribution within <i>Streptococcus</i> sp. | To establish PMEN1 enrichment |
| D39                                                                                          | <i>Streptococcus pneumoniae</i> | CP000410              | Distribution within <i>Streptococcus</i> sp. | To establish PMEN1 enrichment |
| G54                                                                                          | <i>Streptococcus pneumoniae</i> | CP001015              | Distribution within <i>Streptococcus</i> sp. | To establish PMEN1 enrichment |
| GA13494                                                                                      | <i>Streptococcus pneumoniae</i> | AGOZ01000001          | Distribution within <i>Streptococcus</i> sp. | To establish PMEN1 enrichment |
| Hungary19A-6                                                                                 | <i>Streptococcus pneumoniae</i> | CP000936              | Distribution within <i>Streptococcus</i> sp. | To establish PMEN1 enrichment |
| ICE44                                                                                        | <i>Streptococcus pneumoniae</i> | AUYF00000000          | Distribution within <i>Streptococcus</i> sp. | To establish PMEN1 enrichment |
| INV104                                                                                       | <i>Streptococcus pneumoniae</i> | FQ312030              | Distribution within <i>Streptococcus</i> sp. | To establish PMEN1 enrichment |
| JJA                                                                                          | <i>Streptococcus pneumoniae</i> | CP000919              | Distribution within <i>Streptococcus</i> sp. | To establish PMEN1 enrichment |
| MNZ14                                                                                        | <i>Streptococcus pneumoniae</i> | ASJO00000000          | Distribution within <i>Streptococcus</i> sp. |                               |
| MNZ85                                                                                        | <i>Streptococcus pneumoniae</i> | ASJF00000000          | Distribution within <i>Streptococcus</i> sp. |                               |
| SP11-BS70                                                                                    | <i>Streptococcus pneumoniae</i> | ABAC00000000          | Distribution within <i>Streptococcus</i> sp. | To establish PMEN1 enrichment |
| SP14-BS69                                                                                    | <i>Streptococcus pneumoniae</i> | ABAD00000000          | Distribution within <i>Streptococcus</i> sp. | To establish PMEN1 enrichment |
| SP18-BS74                                                                                    | <i>Streptococcus pneumoniae</i> | ABAE00000000          | Distribution within <i>Streptococcus</i> sp. | To establish PMEN1 enrichment |
| SP19-BS75                                                                                    | <i>Streptococcus pneumoniae</i> | ABAF00000000          | Distribution within <i>Streptococcus</i> sp. | To establish PMEN1 enrichment |

|                 |                                       |                 |                                       |                               |
|-----------------|---------------------------------------|-----------------|---------------------------------------|-------------------------------|
| SP23-BS72       | <i>Streptococcus pneumoniae</i>       | ABAG00000000    | Distribution within Streptococcus sp. | To establish PMEN1 enrichment |
| SP3-BS71        | <i>Streptococcus pneumoniae</i>       | AAZZ00000000    | Distribution within Streptococcus sp. | To establish PMEN1 enrichment |
| SP6-BS73        | <i>Streptococcus pneumoniae</i>       | ABAA00000000    | Distribution within Streptococcus sp. | To establish PMEN1 enrichment |
| SP9-BS68        | <i>Streptococcus pneumoniae</i>       | ABAB00000000    | Distribution within Streptococcus sp. | To establish PMEN1 enrichment |
| SPN1041         | <i>Streptococcus pneumoniae</i>       | CACE00000000    | Distribution within Streptococcus sp. |                               |
| SPNA45          | <i>Streptococcus pneumoniae</i>       | CACG00000000    | Distribution within Streptococcus sp. | To establish PMEN1 enrichment |
| <b>SV35-T23</b> | <i>Streptococcus pneumoniae</i>       | ADNN00000000    | Distribution within Streptococcus sp. | To establish PMEN1 enrichment |
| <b>SV36-T3</b>  | <i>Streptococcus pneumoniae</i>       | ADNO00000000    | Distribution within Streptococcus sp. | To establish PMEN1 enrichment |
| Taiwan19F-14    | <i>Streptococcus pneumoniae</i>       | CP000921        | Distribution within Streptococcus sp. | To establish PMEN1 enrichment |
| TIGR4           | <i>Streptococcus pneumoniae</i>       | AE005672        | Distribution within Streptococcus sp. | To establish PMEN1 enrichment |
| WL400           | <i>Streptococcus pneumoniae</i>       | AVFA00000000    | Distribution within Streptococcus sp. |                               |
| WL677           | <i>Streptococcus pneumoniae</i>       | AUWZ00000000    | Distribution within Streptococcus sp. |                               |
| ATCC BAA-960    | <i>Streptococcus pseudopneumoniae</i> | AICS00000000    | Distribution within Streptococcus sp. |                               |
| IS7493          | <i>Streptococcus pseudopneumoniae</i> | CP002925        | Distribution within Streptococcus sp. |                               |
| SK674           | <i>Streptococcus pseudopneumoniae</i> | AJKE00000000    | Distribution within Streptococcus sp. |                               |
| 2426            | <i>Streptococcus tigurinus</i>        | ASXA00000000    | Distribution within Streptococcus sp. |                               |
| AZ_3a           | <i>Streptococcus tigurinus</i>        | AORU00000000    | Distribution within Streptococcus sp. |                               |
| INV200          | <i>Streptococcus pneumoniae</i>       | FQ312029        | Distribution within pneumococcus      | To establish PMEN1 enrichment |
| ST13v1          | <i>Streptococcus pneumoniae</i>       | NZ_ABWQ00000000 | Distribution within pneumococcus      | To establish PMEN1 enrichment |
| ST13v12         | <i>Streptococcus pneumoniae</i>       | NZ_ABWU00000000 | Distribution within pneumococcus      | To establish PMEN1 enrichment |
| ST13v6          | <i>Streptococcus pneumoniae</i>       | NZ_ABWB01000000 | Distribution within pneumococcus      | To establish PMEN1 enrichment |
| AP200           | <i>Streptococcus pneumoniae</i>       | CP002121        | Distribution within pneumococcus      | To establish PMEN1 enrichment |
| MLV016          | <i>Streptococcus pneumoniae</i>       | ABGH00000000    | Distribution within pneumococcus      | To establish PMEN1 enrichment |
| ICE59           | <i>Streptococcus pneumoniae</i>       | AUYE00000000    | Distribution within pneumococcus      | To establish PMEN1 enrichment |
| Sp647           | <i>Streptococcus pneumoniae</i>       | AUYL00000000    | Distribution within pneumococcus      | To establish PMEN1 enrichment |
| Sp6706B         | <i>Streptococcus pneumoniae</i>       | CP002176        | Distribution within pneumococcus      | To establish PMEN1 enrichment |
| SPAIN6B         | <i>Streptococcus pneumoniae</i>       | AUYK00000000    | Distribution within pneumococcus      | To establish PMEN1 enrichment |
| CCRI_1974M2     | <i>Streptococcus pneumoniae</i>       | ABZT00000000    | Distribution within pneumococcus      | To establish PMEN1 enrichment |
| CCRI_1974       | <i>Streptococcus pneumoniae</i>       | ABZC00000000    | Distribution within pneumococcus      | To establish PMEN1 enrichment |
| SP195           | <i>Streptococcus pneumoniae</i>       | ABGE00000000    | Distribution within pneumococcus      | To establish PMEN1 enrichment |
| Spain1417       | <i>Streptococcus pneumoniae</i>       | AUYH00000000    | Distribution within pneumococcus      | To establish PMEN1 enrichment |
| Sp88-1          | <i>Streptococcus pneumoniae</i>       | AUYI00000000    | Distribution within pneumococcus      | To establish PMEN1 enrichment |
| Sp439-1         | <i>Streptococcus pneumoniae</i>       | AUYJ00000000    | Distribution within pneumococcus      | To establish PMEN1 enrichment |
| SPAIN9V         | <i>Streptococcus pneumoniae</i>       | AUYG00000000    | Distribution within pneumococcus      | To establish PMEN1 enrichment |
| N034156         | <i>Streptococcus pneumoniae</i>       | FQ312045        | Distribution within pneumococcus      | To establish PMEN1 enrichment |
| N034183         | <i>Streptococcus pneumoniae</i>       | FQ312043        | Distribution within pneumococcus      | To establish PMEN1 enrichment |
| N994038         | <i>Streptococcus pneumoniae</i>       | FQ312041        | Distribution within pneumococcus      | To establish PMEN1 enrichment |
| N994039         | <i>Streptococcus pneumoniae</i>       | FQ312044        | Distribution within pneumococcus      | To establish PMEN1 enrichment |

|           |                                 |                 |                                  |                               |
|-----------|---------------------------------|-----------------|----------------------------------|-------------------------------|
| OXC141    | <i>Streptococcus pneumoniae</i> | FQ312027        | Distribution within pneumococcus | To establish PMEN1 enrichment |
| SPN021198 | <i>Streptococcus pneumoniae</i> | CACH01000000    | Distribution within pneumococcus | To establish PMEN1 enrichment |
| SPN072838 | <i>Streptococcus pneumoniae</i> | CACI01000000    | Distribution within pneumococcus | To establish PMEN1 enrichment |
| SPN1041   | <i>Streptococcus pneumoniae</i> | CACE01000000    | Distribution within pneumococcus | To establish PMEN1 enrichment |
| P1031     | <i>Streptococcus pneumoniae</i> | CP000920        | Distribution within pneumococcus | To establish PMEN1 enrichment |
| N032672   | <i>Streptococcus pneumoniae</i> | FQ312039        | Distribution within pneumococcus | To establish PMEN1 enrichment |
| N033038   | <i>Streptococcus pneumoniae</i> | FQ312042        | Distribution within pneumococcus | To establish PMEN1 enrichment |
| SPN061370 | <i>Streptococcus pneumoniae</i> | CACJ01000000    | Distribution within pneumococcus | To establish PMEN1 enrichment |
| R6        | <i>Streptococcus pneumoniae</i> | AE007317        | Distribution within pneumococcus | To establish PMEN1 enrichment |
| N7465     | <i>Streptococcus pneumoniae</i> | CACF01000000    | Distribution within pneumococcus | To establish PMEN1 enrichment |
| ST2011v4  | <i>Streptococcus pneumoniae</i> | NZ_ADHN01000000 | Distribution within pneumococcus | To establish PMEN1 enrichment |
