# Supplementary material for: Promiscuous signaling by a regulatory system unique to the pandemic PMEN1 pneumococcal lineage
Source: PubMed Central journal article supplement (PMC5436883; doi:10.1371/journal.ppat.1006339), 2017-05-18
Supplement: ppat.1006339.s005.pdf [file ppat.1006339.s005.pdf]

S2 Table. Genes in this study

| Gene Name                                                    | Gene ID in PN4595-T23 | Gene ID in ATCC700669 | Annotation                                                   |
|--------------------------------------------------------------|-----------------------|-----------------------|--------------------------------------------------------------|
| <i>tprA2</i>                                                 | CGSSp4595_1262        | SPN23F_12750          | Transcriptional regulator from TprA2/PhrA2 system            |
| <i>phrA2</i>                                                 | CGSSp4595_1261        | SPN23F_12740          | Signaling peptide from TprA2/PhrA2 system                    |
| ABC transporter ATPase                                       | CGSSp4595_1260        | SPN23F_12730          | ABC transporter ATPase, same transcript as PhrA2             |
| ABC transporter permease                                     | CGSSp4595_1259        | SPN23F_12720          | putative membrane protein                                    |
| ABC transporter permease                                     | CGSSp4595_1258        | SPN23F_12710          | putative ABC transporter, permease protein                   |
| <i>lcpA</i>                                                  | *                     | SPN23F_12701          | Lanthionine-containing peptide                               |
| <i>lcpM</i>                                                  | CGSSp4595_1257        | SPN23F_12700          | predicted LcpA modifying enzyme                              |
| <i>lcpT</i>                                                  | CGSSp4595_1256        | SPN23F_12690          | predicted LcpA transporter                                   |
| <i>tprA</i>                                                  | CGSSp4595_1947        | SPN23F_19680          | helix-turn-helix family protein                              |
| <i>phrA</i>                                                  | CGSSp4595_1948        | SPN23F_19690          | Signaling peptide from TprA/PhrA system                      |
| LanA associated with TprA                                    | CGSSp4595_1949        | SPN23F_19700          | conserved hypothetical protein                               |
| LanA associated with TprA                                    | CGSSp4595_1950        | SPN23F_19710          | Type II Lantibiotic-like peptide                             |
| LanM associated with TprA                                    | CGSSp4595_1951        | SPN23F_19720          | Lantibiotic synthetase                                       |
| conserved hypothetical protein                               | CGSSp4595_1952        | SPN23F_19740          | conserved hypothetical protein                               |
| toxin secretion ABC transporter ATP-binding/permease protein | CGSSp4595_1953        | SPN23F_19750          | toxin secretion ABC transporter ATP-binding/permease protein |
| LanT associated with TprA                                    | CGSSp4595_1954        | SPN23F_19750          | Lantibiotic transporter                                      |

\* not annotated in original genome submission
