# Supplementary material for: Promiscuous signaling by a regulatory system unique to the pandemic PMEN1 pneumococcal lineage
Source: PubMed Central journal article supplement (PMC5436883; doi:10.1371/journal.ppat.1006339), 2017-05-18
Supplement: ppat.1006339.s006.pdf [file ppat.1006339.s006.pdf]

Table S3. *In vivo* phenotype of PN4595-T23 WT and isogenic mutants in a chinchilla model of pneumococcal disease

| Strain                | Strains & Phenotype |                           |                       | <i>P</i> -values                |                             |                                                    |
|-----------------------|---------------------|---------------------------|-----------------------|---------------------------------|-----------------------------|----------------------------------------------------|
|                       | PN4595-T23 (WT)     | $\Delta$ <i>phrA2-ABC</i> | $\Delta$ <i>tprA2</i> | WT vs $\Delta$ <i>phrA2-ABC</i> | WT vs $\Delta$ <i>tprA2</i> | $\Delta$ <i>tprA2</i> vs $\Delta$ <i>phrA2-ABC</i> |
| Mortality             | 14/19 (74%)         | 7/10 (70%)                | 7/10 (70%)            | NS                              | NS                          | NS                                                 |
| Bacteria in the Brain | 18/19 (95%)         | 8/10 (80%)                | 8/10 (80%)            | NS                              | NS                          | NS                                                 |
| Bacteria in the Lung  | 10/19 (52%)         | 2/10 (20%)                | 8/10 (80%)            | 0.048                           | NS                          | 0.0041                                             |
