# Supplementary material for: Promiscuous signaling by a regulatory system unique to the pandemic PMEN1 pneumococcal lineage
Source: PubMed Central journal article supplement (PMC5436883; doi:10.1371/journal.ppat.1006339), 2017-05-18
Supplement: ppat.1006339.s007.pdf [file ppat.1006339.s007.pdf]

Table S4. PCR primers and nanoString probes used in the study.

| Pimer name                   | Primer Sequence                                                                                               | Application                                                                    |
|------------------------------|---------------------------------------------------------------------------------------------------------------|--------------------------------------------------------------------------------|
| Sp23F_12750_Flank1F          | ACCGACCAAATTCCCAACATATCTC                                                                                     | Deletion of <i>tprA2</i>                                                       |
| Sp23F_12750_Flank1R_XhoI     | ATATATCTCGAGTGGTCATCTCTAACCCCTCTTTAAA                                                                         | Deletion of <i>tprA2</i>                                                       |
| Sp23F_12750_Flank2F_NheI     | ATATATGCTAGCGATAGGTGACTTCGATTGTAATAAG                                                                         | Deletion of <i>tprA2</i>                                                       |
| Sp23F_12750_Flank2R          | CGGCGAAATATTTTAGTCGAACA                                                                                       | Deletion of <i>tprA2</i>                                                       |
| Sp23F_12750_F1SpecF2F        | CCATGGGAATTAAAGATACCACTACTCA                                                                                  | Deletion of <i>tprA2</i>                                                       |
| Sp23F_12750_F1SpecF2R        | GAAATCCATCATGTGAGAAAATAAAGG                                                                                   | Deletion of <i>tprA2</i>                                                       |
| F1_ermB_no_promo_fwd         | GCGCTTCTATGATTTTCAG                                                                                           | Overexpression of <i>tprA2</i>                                                 |
| F1_ermB_no_promo_rev         | aaccctctTATTTTCTCCCGTTAAATAATAG                                                                               | Overexpression of <i>tprA2</i>                                                 |
| plcR_no_promo_fwd            | gaggaaataaAGAGGGTTAGAGATGACC                                                                                  | Overexpression of <i>tprA2</i>                                                 |
| plcR_no_promo_rev            | taactttccTACCTATCCTTATCTTTCAAAAAATG                                                                           | Overexpression of <i>tprA2</i>                                                 |
| F2_no_promo_fwd              | gatagtggaGAAAGTTACACGTTACTAAAG                                                                                | Overexpression of <i>tprA2</i>                                                 |
| F2_no_promo_rev              | GCCCACGAGTAAAGAGAC                                                                                            | Overexpression of <i>tprA2</i>                                                 |
| F1_ermB_promo_fwd            | CCCATTTCATGCAGGAATTATG                                                                                        | Overexpression of <i>tprA2</i>                                                 |
| F1_ermB_promo_rev            | tttctaatacTTATTTCTCCCGTTAAATAATAG                                                                             | Overexpression of <i>tprA2</i>                                                 |
| plcR_with_promo_fwd          | gaggaaataaGTATTAGAAAGTTGAAAAATAGAGATTAAGG                                                                     | Overexpression of <i>tprA2</i>                                                 |
| plcR_with_promo_rev          | taactttccTACCTATCCTTATCTTTCAAAAAATG                                                                           | Overexpression of <i>tprA2</i>                                                 |
| F2_promo_fwd                 | gatagtggaGAAAGTTACACGTTACTAAAGG                                                                               | Overexpression of <i>tprA2</i>                                                 |
| F2_promo_rev                 | GCTTGAGTTTGCCACGA                                                                                             | Overexpression of <i>tprA2</i>                                                 |
| spec_fwd                     | aaatgagaatccagGGATCCCCCGTTTGATTTTAAATG                                                                        | For $\Delta$ <i>phrA2-ABC/OE</i> lanAMT                                        |
| spec_rev                     | aatgttcatcatgcgTGGATCCAATTTTTTTATAATTTTTTTAA<br>TCTG                                                          | For $\Delta$ <i>phrA2-ABC/OE</i> lanAMT                                        |
| ABC_F2_fwd                   | aaaaaattggatccaCGCATGATGAACATTATTTTTG                                                                         | For $\Delta$ <i>phrA2-ABC/OE</i> lanAMT                                        |
| ABC_F2_rev                   | CTCCAGTTTCACCTTTTAAAC                                                                                         | For $\Delta$ <i>phrA2-ABC/OE</i> lanAMT                                        |
| Pep+ABC_F1_fwd               | GCCATCATGAGCTTGTGTTCC                                                                                         | For $\Delta$ <i>phrA2-ABC</i>                                                  |
| Pep+ABC_F1_rev               | tcaaacgggggatccCTCATATTAACCACCTTTTTCTTATC                                                                     | For $\Delta$ <i>phrA2-ABC/OE</i> lanAMT                                        |
| Spec_term_rev                | agcgggggtttttgcgTGGATCCAATTTTTTTATAATTTTTTTA<br>ATCTG                                                         | For $\Delta$ <i>phrA2-ABC/OE</i> lanAMT::OE <i>phrA2-ABC</i>                   |
| Pep+ABC_F1_fwd               | GCCATCATGAGCTTGTGTTCC                                                                                         | For $\Delta$ <i>phrA2-ABC/OE</i> lanAMT::OE <i>phrA2-ABC</i>                   |
| Pep+ABC_F1_rev               | tcaaacgggggatccCTCATATTAACCACCTTTTTCTTATC                                                                     | For $\Delta$ <i>phrA2-ABC/OE</i> lanAMT::OE <i>phrA2-ABC</i>                   |
| spec_fwd (+pep)              | ggtggttaatatgagGGATCCCCCGTTTGATTTTAAATG                                                                       | For $\Delta$ <i>phrA2-ABC/OE</i> lanAMT::OE <i>phrA2-ABC</i>                   |
| Spec-F                       | ATCGATTTTCGTTTCGTGAATACATGTTAT                                                                                | For D39 $\Delta$ <i>phrA2</i>                                                  |
| Spec-R                       | GTTATGCAAGGGTTTATTGTTTTCTA                                                                                    | For D39 $\Delta$ <i>phrA2</i>                                                  |
| LF-SOE1745-F                 | GCGTCCAACGTGGCTCTGCACCA                                                                                       | For D39 $\Delta$ <i>phrA2</i>                                                  |
| LF-SOE1745-R                 | TATTCACGAACGAAAATCGATTTTCTCTGCGAGTGTAT<br>TCATTA                                                              | For D39 $\Delta$ <i>phrA2</i>                                                  |
| RF-SOE1745-F                 | AACAATAAACCCCTTGCATAACAAGGAACTAGATACTGTT<br>TAGTT                                                             | For D39 $\Delta$ <i>phrA2</i>                                                  |
| RF-SOE1745-R                 | GCTAGGACACTATGGACTTCTTG                                                                                       | For D39 $\Delta$ <i>phrA2</i>                                                  |
| <b>Nanostring Probe Name</b> |                                                                                                               |                                                                                |
| <i>tprA2</i>                 | AGAAGCCGTCCAAGAAGCCTTAGAAACCATTGACTTTT<br>GTAACAAAAAGAGACCAGCTATCAGCTGGCTCCTCTT<br>TTAACTATCGTTGCGAATGCCGGA   | enumeration of <i>tprA2</i> mRNA transcripts in nCounter                       |
| <i>ABC ATPase</i>            | GAGAAATCTATGGCTTACTAGGAAGAAATGGTACTGGA<br>AAGACAACCTTTATCAAGGCTATTTTAGGCTTGACAGC<br>TATGGATAGTGGTGAAGTGAATAT  | enumeration of <i>phrA2</i> and <i>ABC ATPase</i> mRNA transcripts in nCounter |
| <i>lcpA</i>                  | AAAAAACCTATTTACGAATCACTAAGTACAGAAGGTAAT<br>CCAGCTGGGGATATCTTGCGTGAACCTAGCGATAGCG<br>AGATGGATCAAGCTATGGCTGGCG  | enumeration of <i>lcpA</i> mRNA transcripts in nCounter                        |
| <i>lcpM</i>                  | TTACCTAATATAGTTTGGGGTAAAGATGGGAACCTCTG<br>GGGTGGATATTAGCGGTCTAAGTTCAAGCGCAGGAGA<br>GATGATCCGATTGAACGTTGCAAGTA | enumeration of <i>lcpM</i> mRNA transcripts in nCounter                        |
| <i>lcpT</i>                  | CAATTATCTGAGACCAGTTGTGGTTTAGCATGCATGG<br>CAATGATTTTAGATTATATGGGCATGAGGCAAACTTA<br>TATGAATTATGCTGTGATTTTGAGA   | enumeration of <i>lcpT</i> mRNA transcripts in nCounter                        |
| <i>gyrB</i>                  | AAGTTTGAAGCGAGATTAAAGAATATATCCAGCCGG<br>GTGCAGATCAAGAAATCAAACCTCAAGAAGCTTTAGCC<br>CGTTATAGTGAAGGTCGTACCAAAC   | enumeration of <i>gyrB</i> mRNA transcripts in nCounter                        |
| <i>metG</i>                  | GGTCGCCTTAATGAAATGCTACGCAACTTCATCGAGC<br>CAGGTTTGAAGATTTGGCGGTATCTCGTACAACCTT<br>TACATGGGGAGTGCCTGTCCCATCAA   | enumeration of <i>metG</i> mRNA transcripts in nCounter                        |
