# Supplementary material for: Promiscuous signaling by a regulatory system unique to the pandemic PMEN1 pneumococcal lineage
Source: PubMed Central journal article supplement (PMC5436883; doi:10.1371/journal.ppat.1006339), 2017-05-18
Supplement: ppat.1006339.s008.pdf [file ppat.1006339.s008.pdf]

Table S5. List of genes with at least 2 fold difference in expression levels between wild-type PN4595-T23 and the isogenic *tprA2* strain.

| Gene ID        | Annotation                                                                  | Fold change<br>( <i>tprA2</i> /WT) | P-value  | Bonferroni | Benjamini-Hochberg |
|----------------|-----------------------------------------------------------------------------|------------------------------------|----------|------------|--------------------|
| SPN23F_12701   | <i>lcpA</i>                                                                 | 62.11                              | 0        | 0          | 0                  |
| CGSSp4595_1258 | putative ABC transporter, permease protein                                  | 58.08                              | 0        | 0          | 0                  |
| CGSSp4595_1257 | <i>lcpM</i>                                                                 | 45.39                              | 0        | 0          | 0                  |
| CGSSp4595_1256 | <i>lcpT</i>                                                                 | 40.38                              | 0        | 0          | 0                  |
| CGSSp4595_1260 | ABC transporter, ATPase                                                     | 34.70                              | 0        | 0          | 0                  |
| CGSSp4595_1255 | FIG01114468: hypothetical protein                                           | 33.68                              | 0        | 0          | 0                  |
| CGSSp4595_1261 | <i>phrA2</i>                                                                | 32.56                              | 0        | 0          | 0                  |
| CGSSp4595_1259 | hypothetical protein                                                        | 31.72                              | 0        | 0          | 0                  |
| CGSSp4595_1253 | unknown                                                                     | 31.62                              | 0        | 0          | 0                  |
| CGSSp4595_1254 | FIG01116415: hypothetical protein                                           | 28.36                              | 0        | 0          | 0                  |
| CGSSp4595_1267 | SNF2 family protein                                                         | 6.99                               | 0        | 0          | 0                  |
| CGSSp4595_1263 | FIG01118149: hypothetical protein                                           | 6.69                               | 0        | 0          | 0                  |
| CGSSp4595_1266 | Retron-type RNA-directed DNA polymerase (EC 2.7.7.49)                       | 4.48                               | 1.06E-13 | 2.04E-10   | 9.71E-12           |
| CGSSp4595_1264 | unknown                                                                     | 4.24                               | 0        | 0          | 0                  |
| CGSSp4595_1270 | conserved domain protein                                                    | 2.76                               | 1.89E-06 | 0.0036369  | 5.87E-05           |
| CGSSp4595_0698 | hypothetical protein                                                        | 2.28                               | 0.00012  | 0.2259078  | 0.003094627        |
| CGSSp4595_1274 | FIG01114970: hypothetical protein                                           | 2.27                               | 4.82E-05 | 0.0930484  | 0.001348527        |
| CGSSp4595_1698 | Transcriptional regulator, GntR family                                      | 2.24                               | 3.28E-10 | 6.32E-07   | 1.41E-08           |
| CGSSp4595_1552 | FIG01114360: hypothetical protein                                           | 2.21                               | 9.73E-12 | 1.88E-08   | 5.69E-10           |
| CGSSp4595_1549 | DNA-cytosine methyltransferase (EC 2.1.1.37)                                | 2.20                               | 2.88E-11 | 5.56E-08   | 1.54E-09           |
| CGSSp4595_0276 | Transposase of IS657                                                        | 2.18                               | 0.00022  | 0.4150853  | 0.005321607        |
| CGSSp4595_0297 | putative ATP-dependent Clp proteinase (ATP-binding subunit)                 | 2.11                               | 1.05E-05 | 0.0201752  | 0.000296694        |
| CGSSp4595_0367 | Macrophage infectivity potentiator protein                                  | 2.07                               | 5.61E-07 | 0.0010831  | 1.84E-05           |
| CGSSp4595_1674 | probable beta-D-galactosidase                                               | 2.04                               | 0.00273  | 1          | 0.039885863        |
| CGSSp4595_1273 | Tn5252, Orf23                                                               | 2.03                               | 0.00128  | 1          | 0.02271382         |
| CGSSp4595_1531 | putative large terminase subunit                                            | 2.02                               | 1.12E-10 | 2.16E-07   | 5.14E-09           |
| CGSSp4595_1550 | Single-stranded DNA-binding protein                                         | 2.01                               | 3.13E-11 | 6.05E-08   | 1.59E-09           |
| CGSSp4595_0800 | Type I restriction-modification system, specificity subunit S (EC 3.1.21.3) | -4.23                              | 0        | 0          | 0                  |
| CGSSp4595_1262 | transcriptional regulator, <i>tprA2</i>                                     | -18.10                             | 0        | 0          | 0                  |
